# Supplementary material for: Above ground biomass dataset from SMOS L band vegetation optical depth and reference maps
Source: Copernicus journal article supplement (doi:10.5194/essd-2024-184), 2024-07-19

Net change during 2011-2019

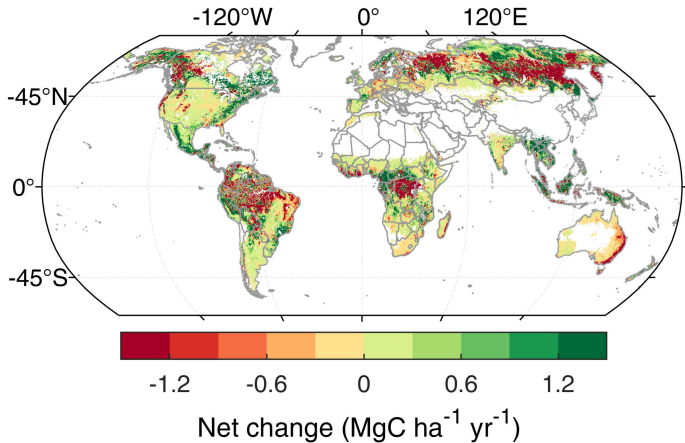

Supplement: Supplementary file [file essd-2024-184-CC1-supplement.pdf]
